# Supplementary material for: The blunted vascular endothelial growth factor-A (VEGF-A) response to high-altitude hypoxia and genetic variants in the promoter region of the VEGFA gene in Sherpa highlanders
Source: PeerJ. 2022 Aug 17;10:e13893. doi: 10.7717/peerj.13893 (PMC9392454; doi:10.7717/peerj.13893)
Supplement: Supplemental Information 1 — Raw data for phenotypes of Sherpa highlanders and non-Sherpa lowlanders (Table 2). [file peerj-10-13893-s001.xlsx]

## Sheet: Sherpas phenotypes
Phenotypes of Sherpa highlanders
	Sex	age	SaO2	Pulse rate (bpm)	VEGF
A1	F	37	94	80	194.389
A100	M	49	94	80	152.87
A101	M	29	94	78	440.75
A102	F	29	95	88	142.96
A103	F	29	93	73	241.61
A104	M	40	94	100	91.205
A105	F	24	93	103	335.75
A12	F	26	95	80	247.072
A15	M	23	94	85	261.847
A19	M	42	91	86	262.564
A20	M	28	94	80	227.673
A21	M	30	90	83	128.293
A22	F	33	92	82	167.288
A23	M	31	94	66	644.246
A28	F	23	92	103	303.302
A31	F	23	95	90	101.442
A33	F	37	92	80	305.058
A35	F	22	96	82	302.599
A36	F	31	92	87	114.043
A41	M	28	93	92	137.825
A45	M	28	94	100	234.305
A46	M	33	93	86	339.036
A47	F	28	92	87	192.055
A48	F	28	96	76	195.939
A50	F	23	96	75	150.083
A51	M	30	91	82	294.506
A52	F	38	95	78	273.272
A54	F	25	95	73	457.766
A55	F	34	93	70	161.083
A58	M	27	96	64	93.472
A6	F	41	96	85	317.685
A64	M	42	94	102	226.933
A67	F	32	96	99	299.786
A73	F	36	91	92	252.498
A74	F	25	96	81	298.027
A75	F	27	97	80	284.622
A77	F	25	94	72	594.01
A79	F	23	95	82	147.495
A80	F	20	92	96	108.099
A86	M	31	90	87	239.431
A87	M	35	95	71	325.388
A88	M	30	94	86	397.14
A91	F	43	95	75	449.741
A92	F	24	95	76	351.31
A93	F	21	94	100	285.96
A94	F	24	92	72	180.83
A95	M	38	93	78	492
A96	M	33	93	70	139.53
A97	M	20	93	84	506
A98	M	50	91	66	172.31
A99	F	48	94	60	139.805
N		51	51	51	51
Mean		30.902	93.6863	82.42	262.802
SE		1.06431	0.238443	1.48	17.9881

## Sheet: Nepalese phenotypes
Phenotypes of non-Sherpa highlanders
	Sex	age	SpO2	Pulse rate (bpm)	VEGFpg/mL
B1	M	31	98	68	511.831
B10	M	27	96	100	796.666
B100	F	39	98	84	295.284
B103	F	39	97	89	540
B104	F	39	98	90	112
B105	F	30	97	94	384
B106	F	34	97	95	250
B107	F	39	98	94	213
B108	F	34	99	87	135
B109	F	39	98	86	86.6
B110	F	32	98	96	51.6
B111	F	33	99	120	163
B112	F	25	98	85	142
B12	F	23	97	68	263.638
B14	F	23	97	77	199.028
B16	F	31	98	72	190.494
B17	F	20	98	93	181.028
B18	M	35	95	125	603.929
B19	F	24	97	92	179.432
B2	F	22	98	124	76.881
B20	F	23	96	84	308.569
B22	F	22	97	112	164.404
B24	F	20	96	91	59.377
B25	F	44	97	120	262.564
B26	F	41	97	125	79.282
B27	M	30	97	77	206.301
B28	F	30	95	76	156.469
B29	F	29	98	95	145.758
B30	F	36	96	73	602.684
B31	F	21	98	94	156.469
B32	M	29	96	102	356.891
B33	M	36	97	84	456.76
B34	M	28	96	70	164.404
B38	M	42	98	72	330.988
B39	M	28	97	65	226.933
B4	M	26	96	80	415.515
B40	M	28	97	78	113.062
B42	M	23	97	60	237.328
B44	M	50	94	77	358.358
B45	M	46	95	75	230.275
B46	M	42	93	92	803.525
B47	M	42	92	77	75.112
B48	M	50	97	78	351.539
B5	M	27	97	80	174.21
B51	M	49	98	68	495.904
B52	M	20	100	84	192.047
B54	M	22	96	83	626.533
B55	M	45	97	81	279.926
B56	M	22	98	66	148.786
B57	M	22	97	78	300.134
B58	M	21	96	104	198.994
B59	M	22	96	82	102.651
B60	M	23	96	60	75.112
B61	M	23	98	101	75.112
B62	F	39	95	92	202.425
B65	M	21	98	66	148.73
B7	M	21	95	90	404.119
B70	F	21	98	75	236.074
B71	F	22	95	70	344.468
B73	M	22	97	96	203.344
B74	F	22	94	90	293.164
B75	F	22	95	80	95.764
B77	M	23	97	80	62.335
B78	M	21	95	82	872.841
B79	M	22	97	56	75.445
B8	M	29	93	80	211.231
B80	M	21	94	73	121.956
B81	M	28	96	71	553.429
B82	M	26	93	96	414.499
B83	F	22	98	81	139.454
B85	M	30	96	84	113.739
B86	M	41	98	72	596.214
B87	F	26	98	76	49.068
B9	F	21	97	110	181.426
B91	F	30	99	83	99.276
B92	F	30	98	100	553.429
N		76	76	76	76
Mean		29.4868	96.6842	85.3421	266.84
SE		0.966726	0.177912	1.75195	21.8866
